# Supplementary material for: What Have We Learnt About the Sourcing of Personal Protective Equipment During Pandemics? Leadership and Management in Healthcare Supply Chain Management: A Scoping Review
Source: PubMed Central journal article supplement (PMC8695796; doi:10.3389/fpubh.2021.765501), 2021-12-09
Supplement: Table_1.pdf [file Table_1.pdf]

| <b>Author</b> | <b>Year</b> | <b>Title</b>    | <b>Country</b>                                                                                                                | <b>Grey/<br/>Peer</b> | <b>Pandemic</b> | <b>Personal and Protective Equipment where referred to specifically</b> |                                                                                    |
|---------------|-------------|-----------------|-------------------------------------------------------------------------------------------------------------------------------|-----------------------|-----------------|-------------------------------------------------------------------------|------------------------------------------------------------------------------------|
| <b>1</b>      | Abedrabboh  | 2021            | Game theory to enhance stock management of Personal Protective Equipment (PPE) during the COVID-19 outbreak                   | UK                    | Peer            | COVID-19                                                                | Not specified                                                                      |
| <b>2</b>      | Atkinson    | 2020            | Supply Chain Manipulation, Misrepresentation, and Magical Thinking During the COVID-19 Pandemic                               | USA                   | Peer            | COVID-19                                                                | Not specified                                                                      |
| <b>3</b>      | Barlow      | (November) 2020 | Sustainability strives for attention, priority in pandemic-stricken world                                                     | Not stated - ?USA     | Grey            | COVID-19                                                                | Refers to gowns, bouffant caps, skull caps, fabric masks and shoe covers.          |
| <b>4</b>      | Barlow      | (August) 2020   | What. Went. Wrong? Supply Chain struggles with its early response to explosive coronavirus pandemic                           | Not stated - ?USA     | Grey            | COVID-19                                                                | Refers to personal protective equipment (PPE) and disinfecting/sanitizing products |
| <b>5</b>      | Barlow      | (July) 2020     | Saluting the resilience of COVID-19 Changemakers Providers, suppliers push through pandemic-related logistics clogs and voids | Not stated - ?USA     | Grey            | COVID-19                                                                | Refers to gloves, masks, respirators and sanitisers                                |
| <b>6</b>      | Belhouideg  | 2020            | Impact of 3D printed medical equipment on the management of the Covid19 pandemic                                              | USA                   | Peer            | COVID-19                                                                | 3D printed masks                                                                   |
| <b>7</b>      | Bhaskar     | 2020            | At the Epicenter of COVID-19—the Tragic Failure of the Global Supply Chain for Medical Supplies                               | China                 | Grey            | COVID-19                                                                | Refers to PPE including N95 masks and surgical masks                               |
| <b>8</b>      | Christ      | 2020            | Healthcare, industry forge new supply chains in the fight against COVID-19                                                    | USA                   | Grey            | COVID-19                                                                | Refers to face masks, respirators, gloves and gowns                                |
| <b>9</b>      | Chuter      | 2020            | Manufacturing leadership in the face of uncertainty                                                                           | Australia             | Grey            | COVID-19                                                                | Not specified                                                                      |

|           |           |             |                                                                                                             |             |      |          |                                                                    |
|-----------|-----------|-------------|-------------------------------------------------------------------------------------------------------------|-------------|------|----------|--------------------------------------------------------------------|
| <b>10</b> | Conway    | (Oct) 2020  | Lessons in disaster and demand planning                                                                     | USA         | Grey | COVID-19 | Not specified                                                      |
| <b>11</b> | Conway    | (Sept) 2020 | Demand planning and forecasting: Healthcare's time has come                                                 | USA         | Grey | COVID-19 | Not specified                                                      |
| <b>12</b> | Dey       | 2020        | All for one and one for all: Why a pandemic preparedness league of nations?                                 | Not stated  | Peer | COVID-19 | N95 respirators, surgical gowns, gloves and masks, 'to name a few' |
| <b>13</b> | Francis   | 2020        | COVID-19: Implications for Supply Chain Management                                                          | USA         | Peer | COVID-19 | Not specified                                                      |
| <b>14</b> | Haldane   | 2020        | National primary care responses to COVID-19: a rapid review of the literature                               | Global      | Peer | COVID-19 | Not specified                                                      |
| <b>15</b> | Handfield | 2020        | A Commons for a Supply Chain in the Post-COVID-19 Era: The Case for a Reformed Strategic National Stockpile | USA         | Peer | COVID-19 | Not specified                                                      |
| <b>16</b> | Handfield | 2021        | How Business Leaders Can Prepare for the Next Health Crisis                                                 | USA         | Grey | COVID-19 | Not specified                                                      |
| <b>17</b> | Leite     | 2020        | COVID-19 outbreak: implications on healthcare operations                                                    | Not stated  | Peer | COVID-19 | Refers to PPE generally with one mention of gowns                  |
| <b>18</b> | Malmir    | 2021        | An applied approach to multi criteria humanitarian supply chain planning for pandemic response              | Global      | Peer | COVID-19 | Includes face masks and face shields, and hand sanitiser           |
| <b>19</b> | Meadmore  | 2020        | How to manage a supply chain in a crisis                                                                    | Not stated  | Grey | COVID-19 | Not specified                                                      |
| <b>20</b> | News Beat | 2014        | Help Keep Ebola Out of Human Supply Chains                                                                  | West Africa | Grey | Ebola    | Not specified                                                      |

|    |             |      |                                                                                                                                         |               |      |                |                                                                                                                                                                         |
|----|-------------|------|-----------------------------------------------------------------------------------------------------------------------------------------|---------------|------|----------------|-------------------------------------------------------------------------------------------------------------------------------------------------------------------------|
| 21 | Schumacher  | 2020 | Strategies to manage product recalls in the COVID-19 pandemic: an exploratory case study of PPE supply chains                           | UK            | Peer | COVID-19       | Refers to PPE generally with one mention of medical masks                                                                                                               |
| 22 | Smith       | 2020 | Steering supplies on a steady track to needed destinations                                                                              | USA           | Grey | COVID-19       | Refers to PPE generally with one mention of masks                                                                                                                       |
| 23 | Vinson      | 2021 | Learning and Collaboration during Crisis: A Novel University-Community Partnership to Manufacture Medical Personal Protective Equipment | USA           | Peer | COVID-19       | N95 masks, face shields and PPE in general                                                                                                                              |
| 24 | Zorn        | 2021 | Addressing the Challenge of COVID-19: One Health Care Site's Leadership Response to the Pandemic                                        | USA           | Peer | COVID-19       | Not specified                                                                                                                                                           |
| 25 | Finkenstadt | 2021 | Blurry vision: Supply chain visibility for personal protective equipment during COVID-19                                                | USA           | Peer | COVID-19       | PPE in general with mentions of masks, gowns and gloves                                                                                                                 |
| 26 | Singh       | 2021 | Personal protective equipment (PPEs) for COVID-19: a product lifecycle perspective                                                      | Not specified | Peer | COVID-19       | <i>"Examples of PPE include such items as gloves, foot and eye protection, protective hearing devices (earplugs, muffs) hard hats, respirators, and full bodysuits"</i> |
| 27 | Patel       | 2017 | Personal Protective Equipment Supply Chain: Lessons Learned From Recent Public Health Emergency Responses                               | USA           | Peer | H1N1 and Ebola | PPE in general with mention of N95 face masks, surgical masks                                                                                                           |
| 28 | Park        | 2021 | Global shortage of personal protective equipment amid COVID-19: supply chains, bottlenecks, and policy implications                     | UK            | Peer | COVID-19       | Includes protective suits and surgical masks, gowns, and gloves                                                                                                         |

|    |        |      |                                                                                                     |               |      |          |                                                                                                      |
|----|--------|------|-----------------------------------------------------------------------------------------------------|---------------|------|----------|------------------------------------------------------------------------------------------------------|
| 29 | Chopra | 2020 | The coronavirus has upended supply chains. Here's how companies can prepare for the next disruption | Not specified | Grey | COVID-19 | Mentions hand sanitizer and masks                                                                    |
| 30 | Sharma | 2020 | COVID-19: Impact on Health Supply Chain and Lessons to be learnt,                                   | India         | Peer | COVID-19 | Mentions face protection, goggles and mask or face shield, gloves, gown, head cover and rubber boots |

**Supplementary Material: Characteristics of papers selected for analysis**
